# Supplementary material for: Translation of ABCE1 Is Tightly Regulated by Upstream Open Reading Frames in Human Colorectal Cells
Source: MDPI journal article supplement (doi:10.3390/biomedicines9080911), 2021-07-29
Supplement: s1 [file s1]

## SUPPLEMENTARY MATERIALS

**Translation of *ABCE1* is tightly regulated by upstream open reading frames in human colorectal cells**

**Table S1.** Sequence of the primers used to generate the constructs needed to study the function of the AUG uORFs of the human *ABCE1* transcript.

| Primer | Sequence (5'→3')                             |
|--------|----------------------------------------------|
| #1     | CCCAAGCTTAAGCCGTGTCCGCACCAGAC                |
| #2     | CTTTATGTTTTTGCGTCTTCCATAACTGGGCGAAAGAATATCC  |
| #3     | GGATATTCTTTGCGCCAGTTATGGAAGACGCCAAAAACATAAAG |
| #4     | GGACTCTGGTACAAAATCGT                         |
| #5     | CTGACACCTCCAGCGTTAGATTGACTAAGGCTCCACTCCTG    |
| #6     | CAGGAGTGGAGCCTTAGTCAATCTAACGCTGGAGGTGTCAG    |
| #7     | GATTGAAACCGGAGAGGCGATTGCATCTGTTTACGCTAGGA    |
| #8     | TCCTAGCGTAAACAGATGCAATCGCCTCTCCGGTTTCAATC    |
| #9     | TGAACAAGGGTCGCAGCTCATTGACGTCATATCTCCCTACC    |
| #10    | GGTAGGGAGATATGACGTCAATGAGCTGCGACCCTTGTTCA    |
| #11    | AGGGTTCCGCCTCACGCTCTTTGTCGCGCGCGCGCACTACG    |
| #12    | CGTAGTGCGCGCGCGCGACAAAGAGCGTGAGGCGGAACCCT    |
| #13    | GCGCGCGCGCACTACGTCTTTGGCTTGCGCGTGCGGCGGC     |
| #14    | GCCGCCGCACGCGCAAGCCAAAGGACGTAGTGCGCGCGCGC    |
| #15    | TGGATATTCTTTGCGCCAGTATGGAAGACGCCAAAAACAT     |
| #16    | ATGTTTTTGCGTCTTCCATACTGGGCGAAAGAATATCCA      |
| #17    | CACTCCTGACCCACCGGCTGGAGGAAAGCGCAAACGTAAA     |
| #18    | TTTACGTTTGCGCTTTCCTCCAGGCCGGTGGGTCAGGAGTG    |
| #19    | GCTGGCTTCGCCAACGGCGTGGAACAAGGGTCGCAGCTCA     |
| #20    | TGAGCTGCGACCTTGTTCCACGCCGTTGGCGAAGCCAGC      |
| #21    | CACGCTGTGTGGCTGAAAAGGGAAGGCAAGAGCTGATTGG     |
| #22    | CCAAATCAGCTCTTGCCTTCCCTTTTCAGCCACACAGCGTG    |
| #23    | GAACAAGGGTCGCAGCTCAAGGACGTCATATCTCCCTACCT    |
| #24    | AGGTAGGGAGATATGACGTCCTTGAGCTGCGACCCTTGTTT    |
| #25    | GTGAGAACACGCTGTGTGGCGGAAAAGTGAAGGCAAGAGCT    |
| #26    | AGCTCTTGCTTCACTTTTCCGCCACACAGCGTGTTCTCAC     |
| #27    | TGACACCTCCAGCGTTACCATGGCTAAGGCTCCACTCCTG     |
| #28    | CAGGAGTGGAGCCTTAGCCATGGTAACGCTGGAGGTGTCA     |
| #29    | GATTGAAACCGGAGAGGACCATGGATCTGTTTACGCTAGG     |
| #30    | CCTAGCGTAAACAGATCCATGGTCCTCTCCGGTTTCAATC     |
| #31    | TGAACAAGGGTCGCAGCACCATGGCGTCATATCTCCCTAC     |
| #32    | GTAGGGAGATATGACGCCATGGTGCTGCGACCCTTGTTCA     |
| #33    | AGGGTTCCGCCTCACGCACCATGGCGCGCGCGCACTAC       |
| #34    | GTAGTGCGCGCGCGCGCCATGGTGCGTGAGGCGGAACCCT     |
| #35    | GCGCGCGCGCACTACGTACCATGGCTTGCGCGTGCGG        |
| #36    | CCGCACGCGCAAGCCATGGTACGTAGTGCGCGCGCGC        |
| #37    | AAGAGCTGATTTGGCCTCTGGCTCCCCTCCGCAAGGGGAT     |
| #38    | ATCCCCTTGCGGAGGGGAGCCAGAGGCCAAATCAGCTCTT     |

**Table S2.** Sequence of the primers used to generate the constructs needed to study the function of the non-AUG uORFs of the human *ABCE1* transcript.

| Primer | Sequence (5'→3')                           |
|--------|--------------------------------------------|
| #1     | GCGCGCGCGCACTACGTCCTTTGGCTTGCGCGCGCGGCGGCT |
| #2     | AGCCGCCGCGCGCGCAAGCCAAAGGACGTAGTGCGCGCGCGC |
| #3     | TACGTCCTATGGCTTGCGCGCGCGGCGGCTGGGCACCGCCA  |
| #4     | TGGCGGTGCCCAGCCGCCGCGCGCAAGCCATAGGACGTA    |
| #5     | GGCACCGCCATTTTGGCCGGCGGCCGTGAGAACACGCTGTG  |
| #6     | CACAGCGTGTTCTCACGGCCGCCGCCAAAATGGCGGTGCC   |
| #7     | ACACGCTGTGTGGCTGAAAAGCGAAGGCAAGAGCTGATTG   |
| #8     | CAAATCAGCTCTTGCCTTCGCTTTTCAGCCACACAGCGTGT  |
| #9     | CTGAAAAGTGAAGGCAAGAGGCGATTTGGCCTCTGTGCTCCC |
| #10    | GGGAGCACAGAGGCCAAATCGCCTCTTGCCTTCACTTTTCAG |
| #11    | CTGAAAAGCGAAGGCAAGAGGCGATTTGGCCTCTGTGCTCCC |
| #12    | GGGAGCACAGAGGCCAAATCGCCTCTTGCCTTCGCTTTTCAG |
| #13    | AAGAGGCGATTTGGCCTCTGCGCTCCCCTCCGCAAGGGGAT  |
| #14    | ATCCCCTTGCGGAGGGGAGCGCAGAGGCCAAATCGCCTCTT  |
| #15    | GATCGTTTTCTCCAGAAGAGGCGGATATTCTTTCGCCCAGTT |
| #16    | AACTGGGCGAAAGAATATCCGCCTCTTCTGGAGAAAACGATC |
| #17    | ACACGCTGTGTGGCTGAAAAATGAAGGCAAGAGCTGATTG   |
| #18    | CAAATCAGCTCTTGCCTTCATTTTCAGCCACACAGCGTGT   |
| #19    | CAAGAGCTGATTTGGCCTCTATGCTCCCCTCCGCAAGGGGA  |
| #20    | TCCCCTTGCGGAGGGGAGCATAGAGGCCAAATCAGCTCTTG  |
| #21    | GATCGTTTTCTCCAGAAGAGATGGATATTCTTTCGCCCAGT  |
| #22    | ACTGGGCGAAAGAATATCCATCTCTTCTGGAGAAAACGATC  |
| #23    | CTACGTCCTTTGGCTTGCGCATGCGGCGGCTGGGCACCGCC  |
| #24    | GGCGGTGCCCAGCCGCCGCATGCGCAAGCCAAAGGACGTAG  |
| #25    | GGGCACCGCCATTTTGGCCGATGGCCGTGAGAACACGCTGT  |
| #26    | ACAGCGTGTTCTCACGGCCATCGGCCAAAATGGCGGTGCCC  |

**Table S3.** Primers used in the RT-qPCR and in the semi-quantitative RT-PCR.

| Primer | Sequence (5'→3')         |
|--------|--------------------------|
| #1     | CAACTGCATAAGGCTATGAAGAGA |
| #2     | ATTTGTATTAGCCCATATCGTTT  |
| #3     | AACGCGGCCTCTTCTTATTT     |
| #4     | ACCAGATTTGCCTGATTTGC     |
| #5     | ATTAAGAAATGCCCCTTTGGCG   |
| #6     | GAAGTTTGAAGGCATTGGCACA   |
| #7     | CCATGAGAAGTATGACAACAGCC  |
| #8     | GGGTGCTAAGCAGTTGGTG      |
